# Supplementary material for: Highly conductive short chain carboxylic acid encapsulated silver nanoparticle based inks for direct write technology applications
Source: Royal Society of Chemistry journal article supplement (doi:10.1039/c2tc00336h), 2012-11-05
Supplement: c2tc00336h.pdf [file c2tc00336h.pdf]

## Supplementary Information

### **Highly Conductive Short Chain Carboxylic Acids Encapsulated Silver Nanoparticle Based Inks for Direct Write Technology Applications**

**Krishnamraju Ankireddy\*, Swathi Vunnam, Jon Kellar, and William Cross**

Department of Materials and Metallurgical Engineering, South Dakota School of Mines and Technology, Rapid City, SD 57701, USA.

Corresponding Author

E-mail: [krishnamraju.ankireddy@mines.sdsmt.edu](mailto:krishnamraju.ankireddy@mines.sdsmt.edu).

Telephone: 417-693-1918; Fax: 605-394-3369

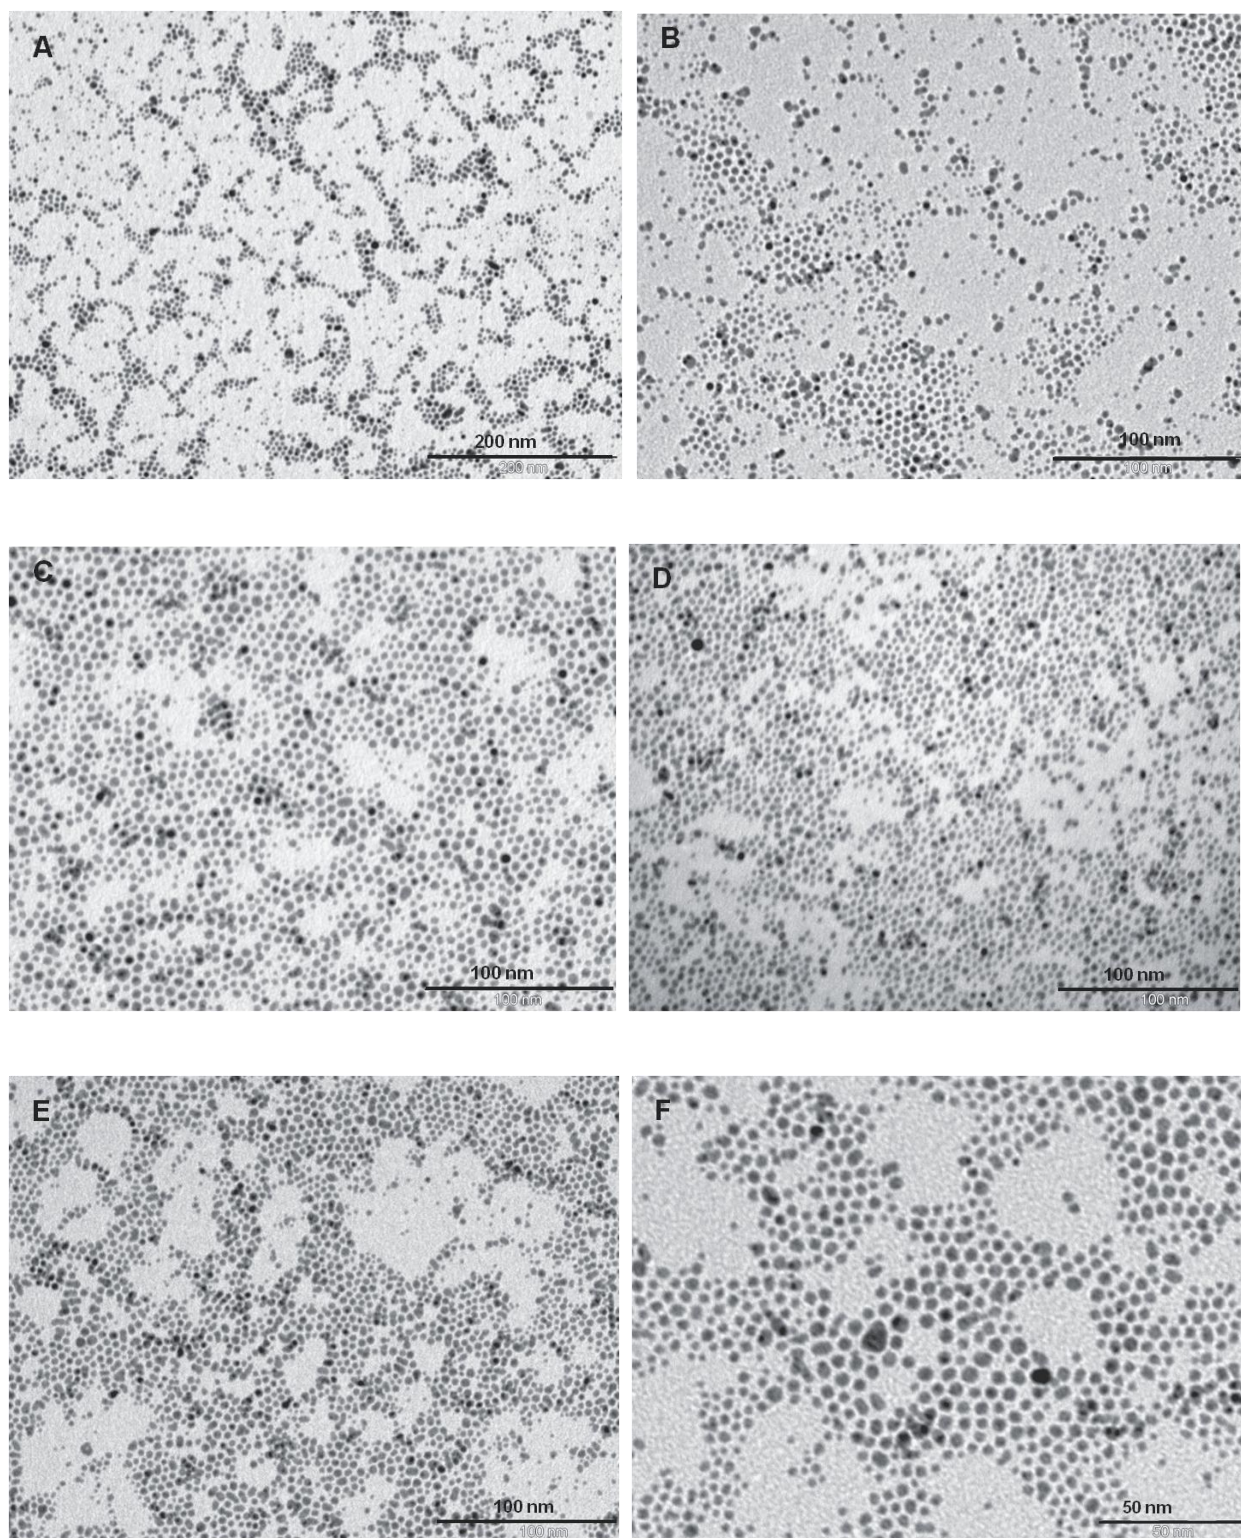

**Fig. S1** TEM micrographs of various silver nanoparticles (A). C6, (B) C8, (C) C10, (D) C6/C8, (E) C6/C10, (F) C8/C10 Ag NPs.

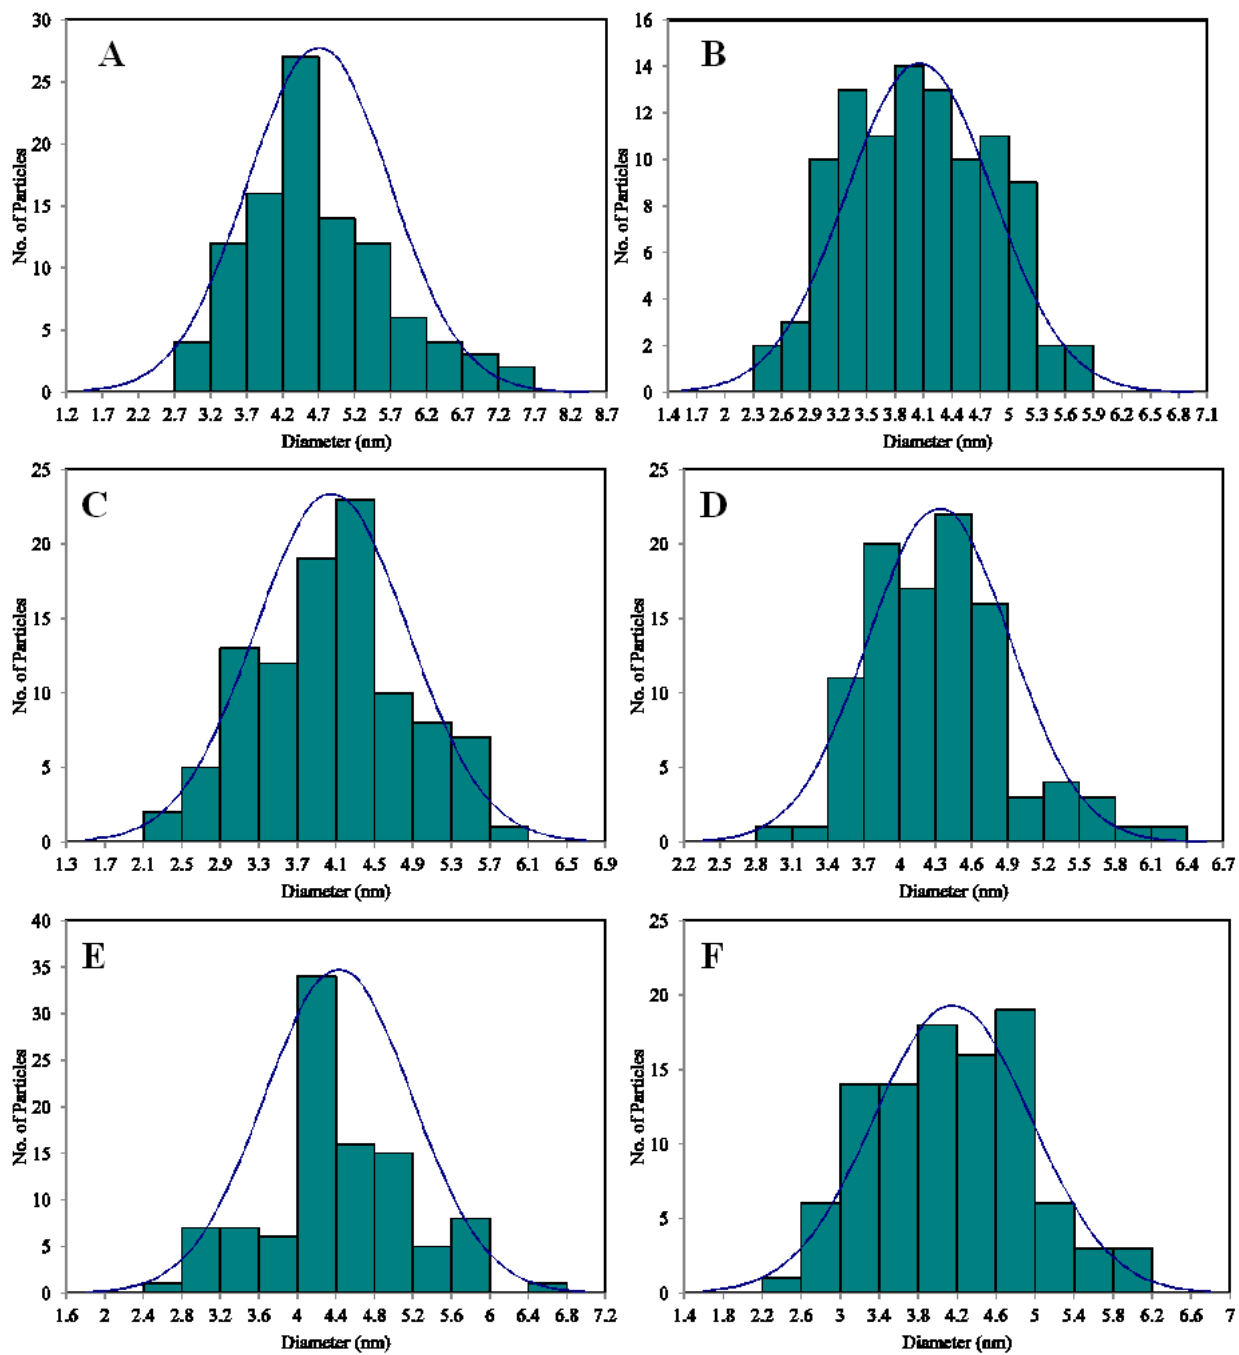

**Fig. S2** Particle size distribution of (A) C6, (B) C8, (C) C10, (D) C6/C8, (E) C6/C10, and (F) C8/C10.
